# Supplementary material for: A disposable tartrazine sensor fabricated with a synchronously activated nanocomposite comprising gadolinium molybdate nanoflowers anchored on functionalized carbon nanofibers
Source: Royal Society of Chemistry journal article supplement (doi:10.1039/d3nj05265f), 2023-12-30
Supplement: d3nj05265f1.pdf [file d3nj05265f1.pdf]

**Supporting information**

**Disposable Tartrazine Sensor Fabricated with Synchronously Activated Nanocomposite  
Comprising Gadolinium Molybdate Nanoflowers Anchored Functionalized Carbon  
Nanofibers**

Abishek Jayapaul <sup>1</sup>, Rajalakshmi Sakthivel <sup>1</sup>, Yu-Chien Lin <sup>1</sup>, Udesb Dhawan <sup>2</sup>, Xinke Liu <sup>3,4</sup>,  
Hsiao-Wei Wen <sup>5,6</sup>, Ren-Jei Chung <sup>1,7,\*</sup>

<sup>1</sup> Department of Chemical Engineering and Biotechnology, National Taipei University of  
Technology (Taipei Tech), Taipei 10608, Taiwan

<sup>2</sup> Centre for the Cellular Microenvironment, Division of Biomedical Engineering, James Watt  
School of Engineering, Mazumdar-Shaw Advanced Research Centre, University of Glasgow,  
Glasgow G116EW, UK

<sup>3</sup> College of Materials Science and Engineering, Chinese Engineering and Research Institute of  
Microelectronics, Shenzhen University, Shenzhen 518060, China

<sup>4</sup> Department of Electrical and Computer Engineering, National University of Singapore,  
Singapore 117583, Singapore

<sup>5</sup> Department of Food Science and Biotechnology, National Chung Hsing University, Taichung  
402202, Taiwan

<sup>6</sup> Food and Animal Product Safety Inspection Center, National Chung Hsing University, Taichung  
402202, Taiwan

<sup>7</sup> High-value Biomaterials Research and Commercialization Center, National Taipei University of  
Technology (Taipei Tech), Taipei 10608, Taiwan

23 **\*Correspondence to:** Department of Chemical Engineering and Biotechnology, National Taipei  
24 University of Technology (Taipei Tech), No. 1, Section 3, Zhongxiao E. Rd., Taipei 10608  
25 Taiwan.  
26 E-mail addresses: [rjchung@ntut.edu.tw](mailto:rjchung@ntut.edu.tw) (R.-J. Chung)

| <i>Entry</i>   | <i>Table of contents</i>                                                                                                                                                                                                                                                                                                                                                                                                                                                                                           | <i>Page no.</i>  |
|----------------|--------------------------------------------------------------------------------------------------------------------------------------------------------------------------------------------------------------------------------------------------------------------------------------------------------------------------------------------------------------------------------------------------------------------------------------------------------------------------------------------------------------------|------------------|
| <i>Fig. S1</i> | <i>Zeta potential of different modified electrodes</i>                                                                                                                                                                                                                                                                                                                                                                                                                                                             | <u><i>S5</i></u> |
| <i>Fig. S2</i> | <i>EIS spectra for different electrodes (Bare and modified) performed in <math>[\text{Fe}(\text{CN})_6]^{3-/4-}</math> in 0.1 M KCl as electrolyte; (inset) Randel's equivalent circuit in EIS studies.</i>                                                                                                                                                                                                                                                                                                        | <u><i>S5</i></u> |
| <i>Fig. S3</i> | <i>CV curves for different electrodes (Bare and modified) performed in <math>[\text{Fe}(\text{CN})_6]^{3-/4-}</math> in 0.1 M KCl as electrolyte.</i>                                                                                                                                                                                                                                                                                                                                                              | <u><i>S6</i></u> |
| <i>Fig. S4</i> | <i>CV profile obtained by varying scan rates from 0.02-0.2 <math>\text{Vs}^{-1}</math> at (A) <math>\text{Gd}_2\text{MoO}_6/\text{SPCE}</math>, (C) <math>f\text{-CNF}/\text{SPCE}</math>, and (E) <math>\text{Gd}_2\text{MoO}_6/f\text{-CNF}/\text{SPCE}</math>; (B, D, and F) corresponding calibrated plot of the square root of scan rate versus anodic and cathodic peak currents; All the above experiments were performed in <math>[\text{Fe}(\text{CN})_6]^{3-/4-}</math> in 0.1 M KCl as electrolyte.</i> | <u><i>S7</i></u> |
| <i>Fig. S5</i> | <i>(A) CV profile obtained by varying scan rates from 0.02-3.2 <math>\text{Vs}^{-1}</math> at <math>\text{Gd}_2\text{MoO}_6/f\text{-CNF}/\text{SPCE}</math>; (B) Calibrated plot of the scan rate versus anodic peak currents; (C) log of scan rates versus log of peak currents; All the above experiments were performed in</i>                                                                                                                                                                                  | <u><i>S8</i></u> |

|                 |                                                                                                                                                                                                         |                   |
|-----------------|---------------------------------------------------------------------------------------------------------------------------------------------------------------------------------------------------------|-------------------|
|                 | <i>0.1 M PB as electrolyte</i>                                                                                                                                                                          |                   |
| <i>Fig. S6</i>  | <i>Plot of interferences versus corresponding relative current error percentage.</i>                                                                                                                    | <u><i>S9</i></u>  |
| <i>Fig. S7</i>  | <i>Functional stability of Gd<sub>2</sub>MoO<sub>6</sub>/f-CNF/SPCE analyzed over 50 continuous CV cycles.</i>                                                                                          | <u><i>S9</i></u>  |
| <i>Fig. S8</i>  | <i>(A) CV curves obtained for different SPCE coated with Gd<sub>2</sub>MoO<sub>6</sub>/f-CNF composite;<br/>(B) Calibrated plot of the modified electrodes versus relative current error percentage</i> | <u><i>S10</i></u> |
| <i>Fig. S9</i>  | <i>CV plot of spiked and un-spiked addition of TRZ in orange juice sample</i>                                                                                                                           | <u><i>S10</i></u> |
| <i>Fig. S10</i> | <i>CV plot of spiked and un-spiked addition of TRZ in orange candy sample</i>                                                                                                                           | <u><i>S11</i></u> |
| <i>Fig. S11</i> | <i>CV plot of spiked and un-spiked addition of TRZ in carrot juice sample</i>                                                                                                                           | <u><i>S11</i></u> |
| <i>Fig. S12</i> | <i>CV plot of spiked and un-spiked addition of TRZ in orange ice-cream sample</i>                                                                                                                       | <u><i>S12</i></u> |
| <i>Table 1</i>  | <i>Recovery estimation table for real sample analysis.</i>                                                                                                                                              | <u><i>S13</i></u> |

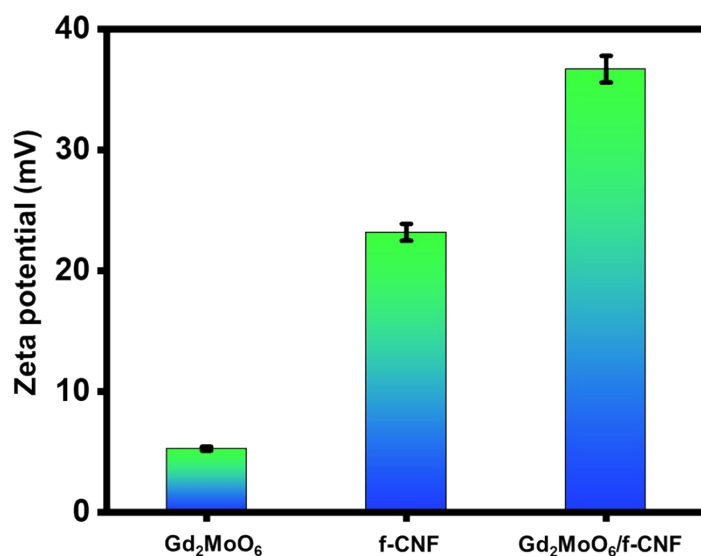

Fig. S1. Zeta potential of different modified electrodes

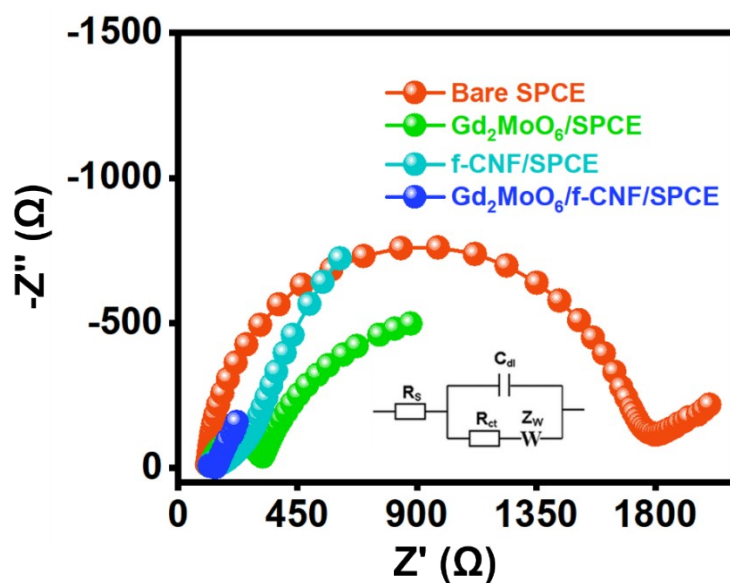

Fig. S2. (A) EIS spectra for different electrodes (Bare and modified) performed in  $[\text{Fe}(\text{CN})_6]^{3-/4-}$  in 0.1 M KCl as electrolyte; (inset) Randel's equivalent circuit in EIS studies.

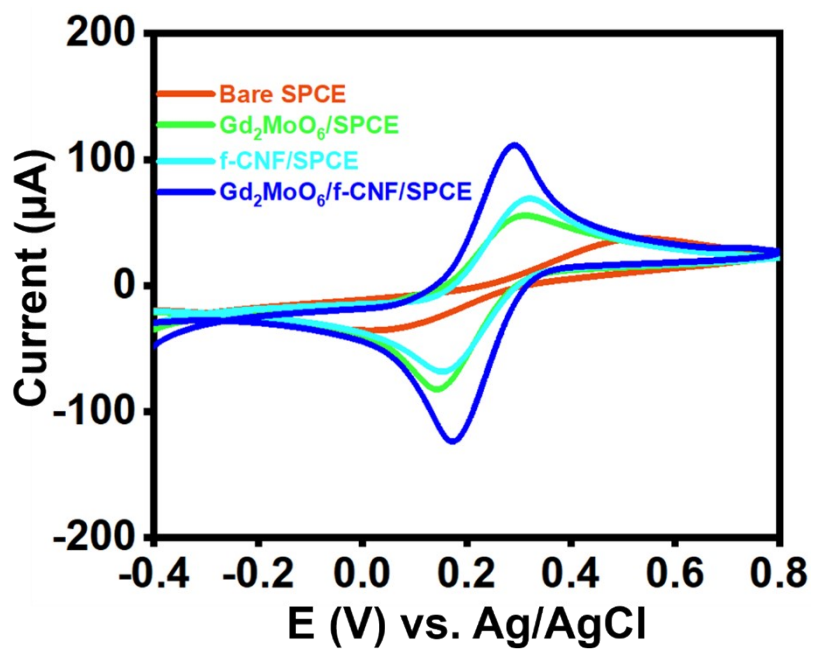

34

35 **Fig. S3.** (A) CV curves for different electrodes (Bare and modified) performed in  $[\text{Fe}(\text{CN})_6]^{3-/4-}$  in  
 36 0.1 M KCl as electrolyte.

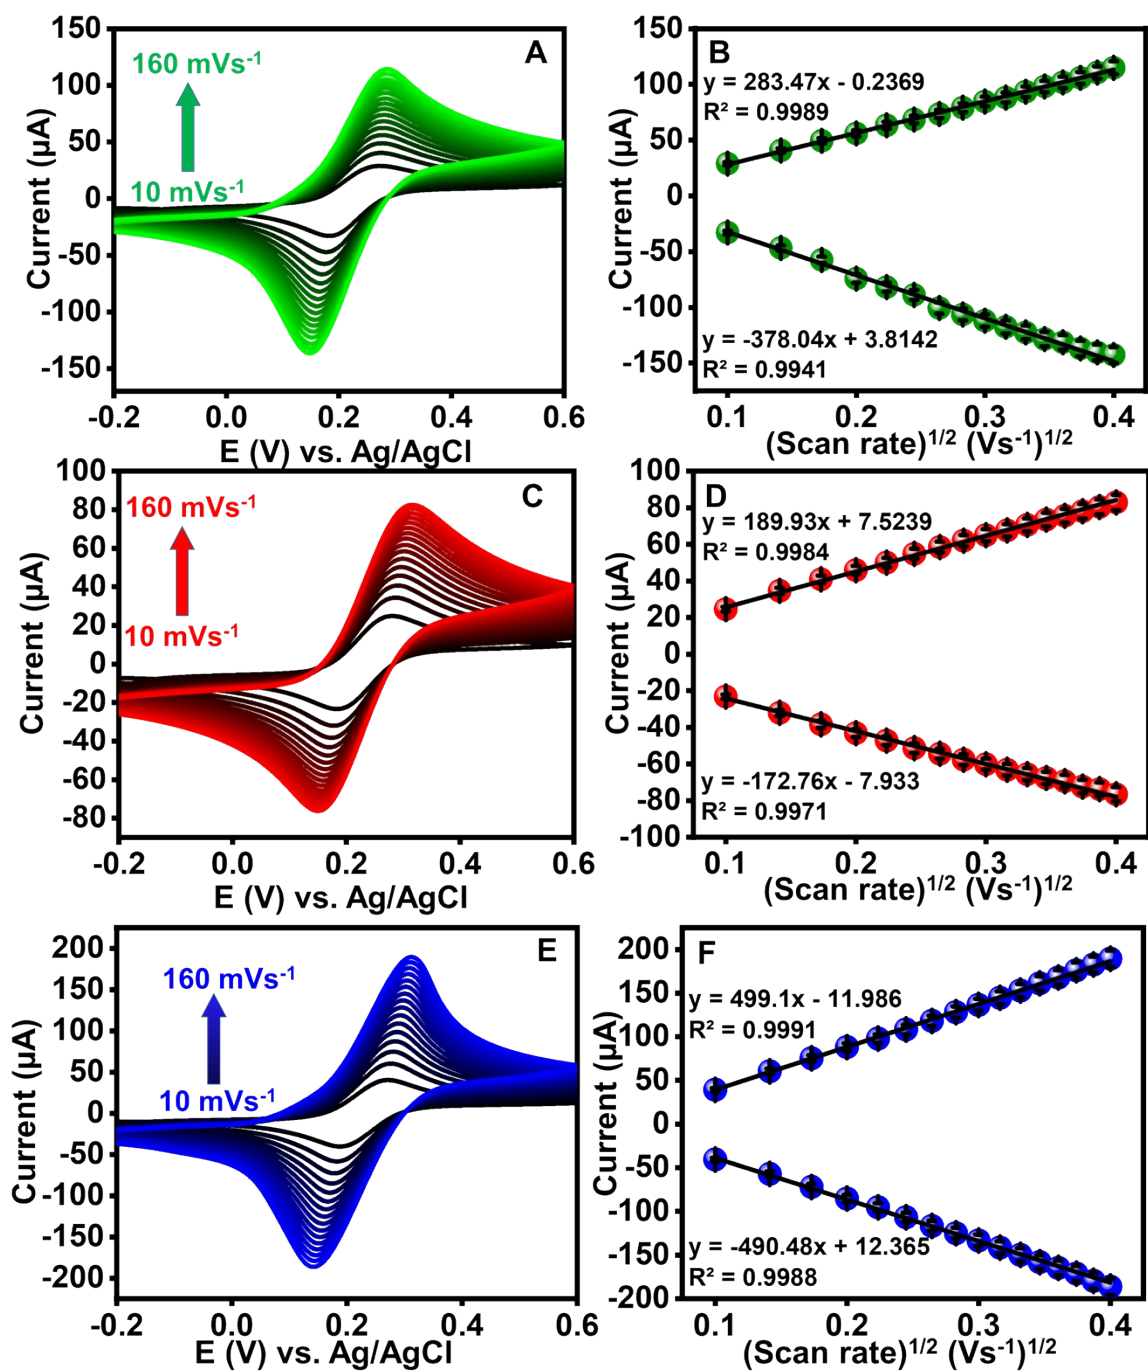

37

38 **Fig. S4.** CV profile obtained by varying scan rates from 0.02-0.2 Vs<sup>-1</sup> at (A) Gd<sub>2</sub>MoO<sub>6</sub>/SPCE, (C)  
 39 f-CNF/SPCE, and (E) Gd<sub>2</sub>MoO<sub>6</sub>/f-CNF/SPCE; (B, D, and F) corresponding calibrated plot of the

40 square root of scan rate versus anodic and cathodic peak currents; All the above experiments were  
 41 performed in  $[\text{Fe}(\text{CN})_6]^{3-/4-}$  in 0.1 M KCl as electrolyte.

42

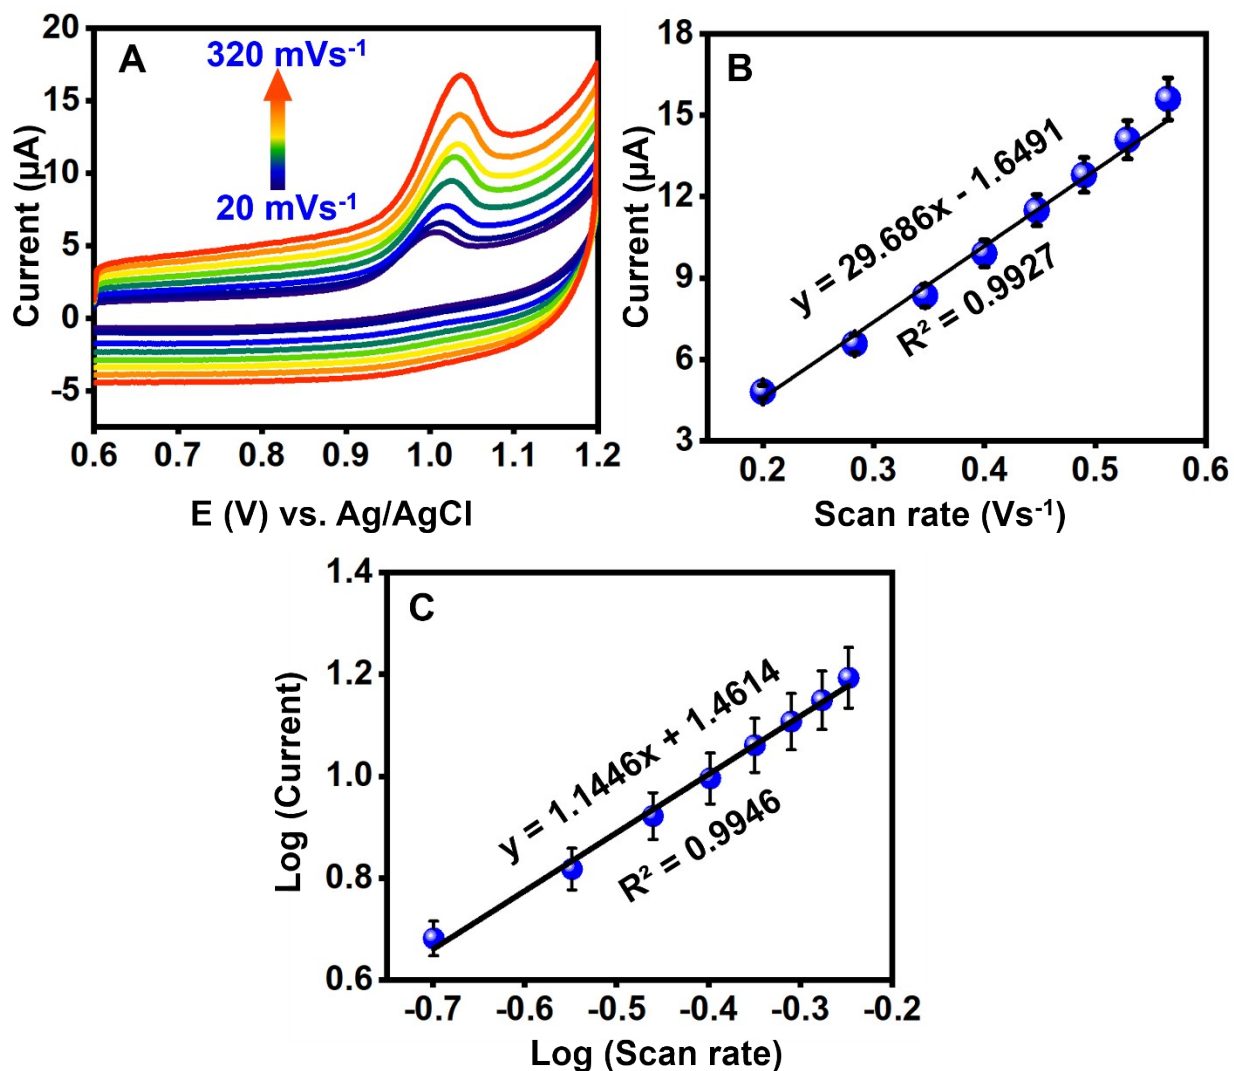

43

44 **Fig. S5.** (A) CV profile obtained by varying scan rates from 0.02-3.2  $\text{Vs}^{-1}$  at  $\text{Gd}_2\text{MoO}_6/\text{f}$ -  
 45  $\text{CNF}/\text{SPCE}$ ; (B) Calibrated plot of the scan rate versus anodic peak currents; (C) log of scan rates  
 46 versus log of peak currents; All the above experiments were performed in 0.1 M PB as electrolyte.

47

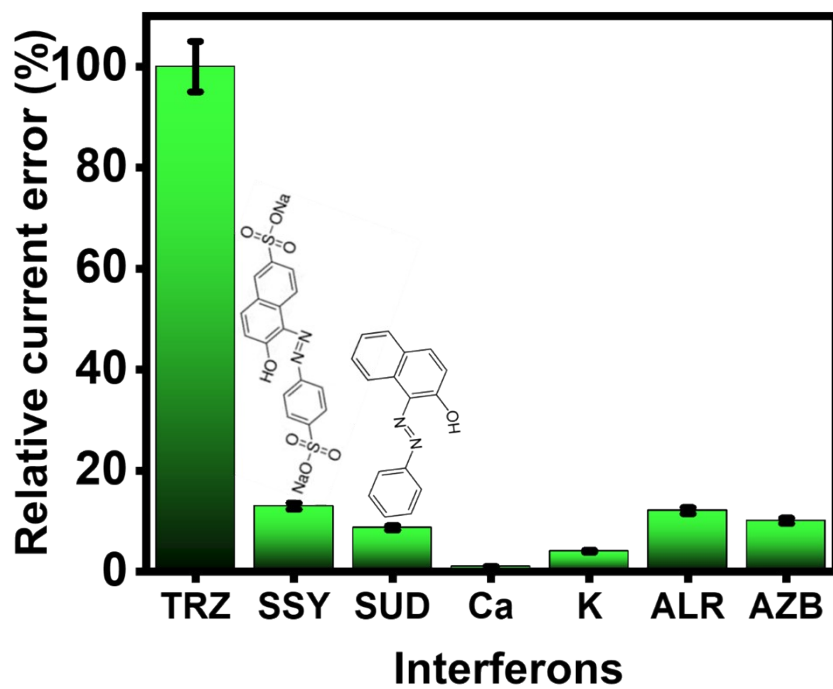

**Fig. S6.** Plot of interferents versus corresponding relative current error percentage.

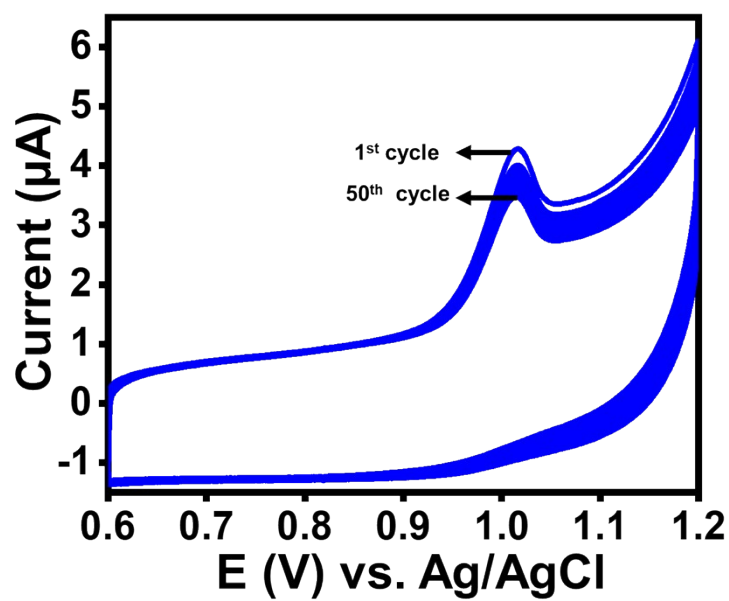

**Fig. S7.** Functional stability of  $\text{Gd}_2\text{MoO}_6/\text{f-CNF}/\text{SPCE}$  analyzed over 50 continuous CV cycles.

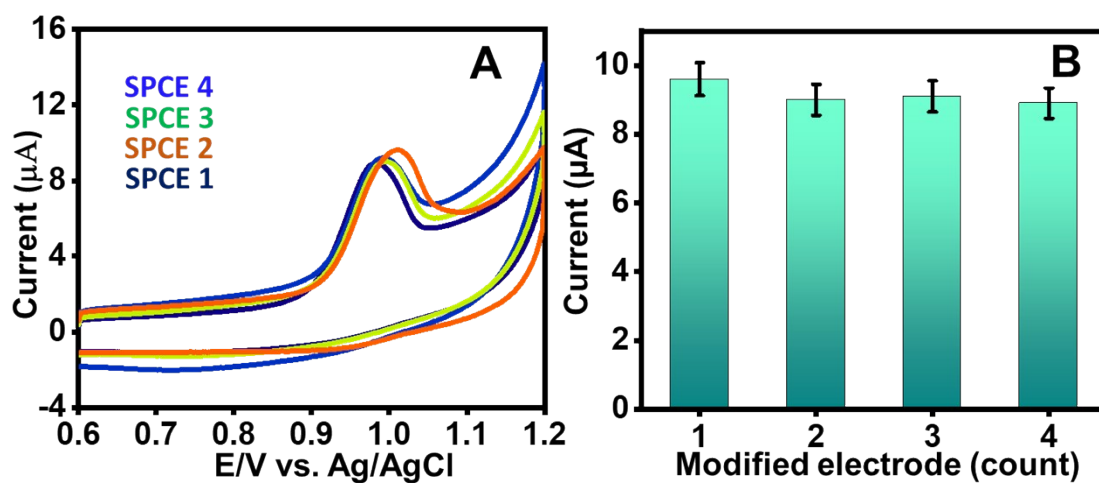

52

53 **Fig. S8.** (A) CV curves obtained for different SPCE coated with  $\text{Gd}_2\text{MoO}_6/\text{f-CNF}$  composite; (B)  
 54 Calibrated plot of the modified electrodes versus relative current.

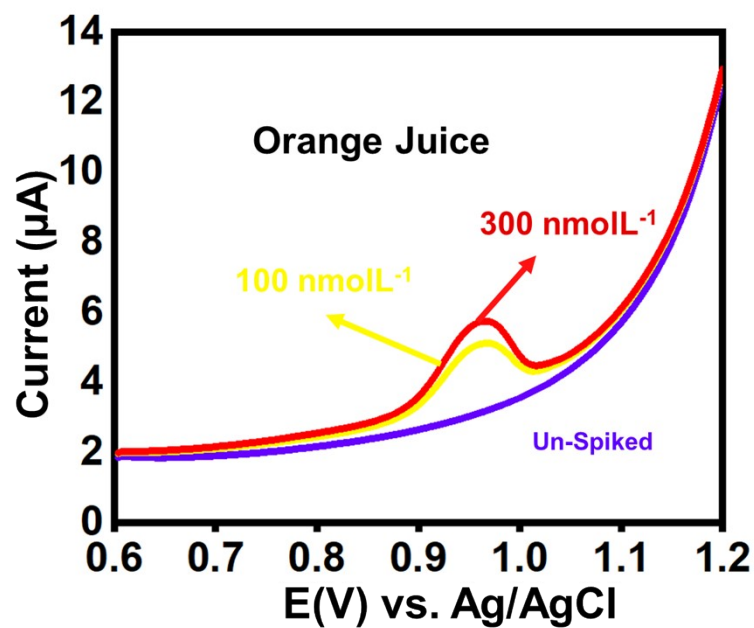

55

56 **Fig. S9.** DPV plot of spiked and un-spiked addition of TRZ in orange juice sample.

57

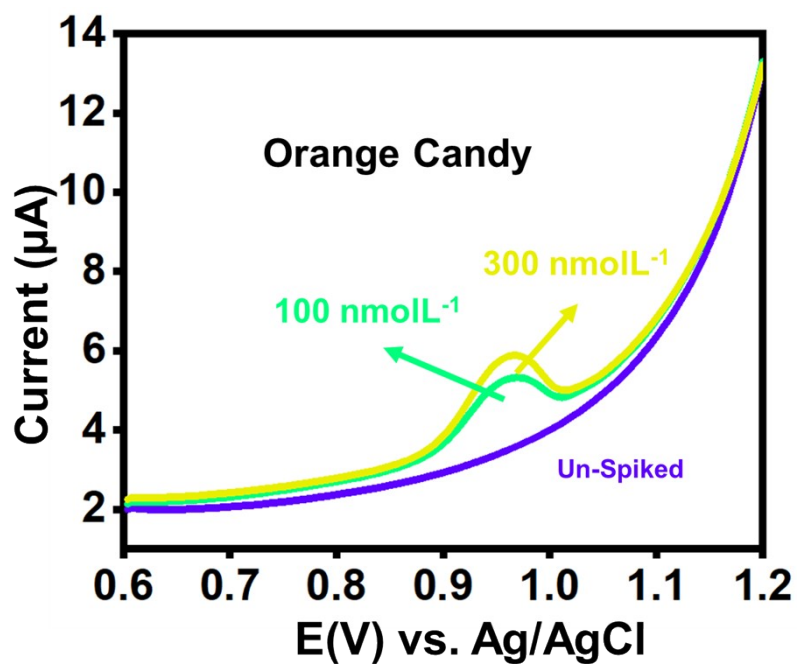

**Fig. S10.** DPV plot of spiked and un-spiked addition of TRZ in orange candy sample.

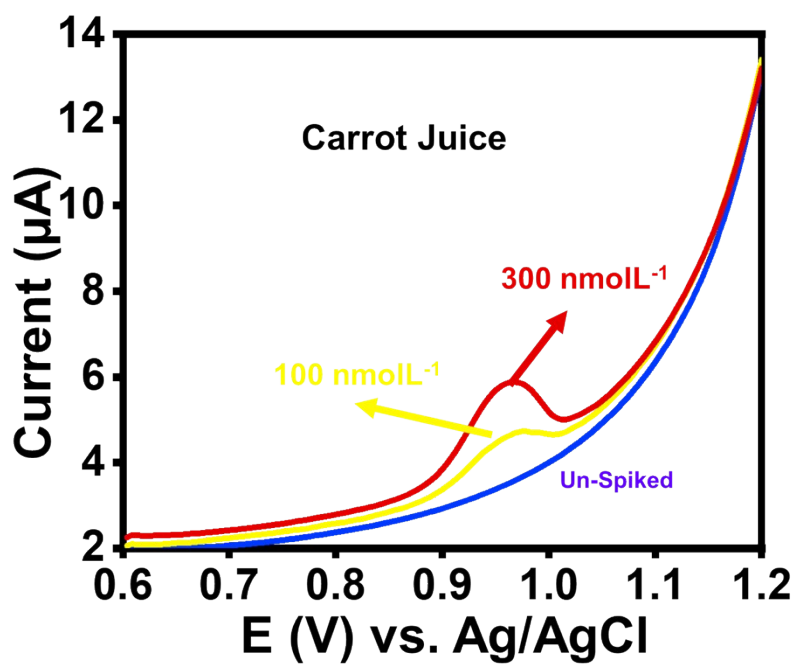

**Fig. S11.** DPV plot of spiked and un-spiked addition of TRZ in carrot juice sample.

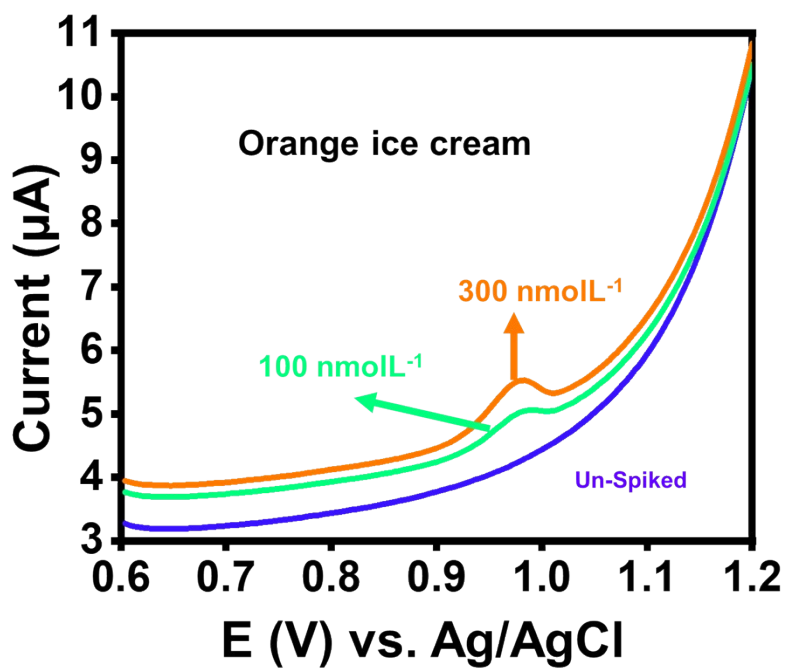

**Fig. S12.** DPV plot of spiked and un-spiked addition of TRZ in orange ice-cream sample.

**Table S1:** Recovery estimation table for real sample analysis.

| Sample           | Added<br>(nmolL <sup>-1</sup> ) | Found<br>DPV<br>(nmolL <sup>-1</sup> ) | GC-MS  | Recovery (%) |       | RSD (±%) |       |
|------------------|---------------------------------|----------------------------------------|--------|--------------|-------|----------|-------|
|                  |                                 |                                        |        | DPV          | GC-MS | DPV      | GC-MS |
| Orange juice     | 0                               | 0                                      | 0      | 0            | 0     | -        | -     |
|                  | 100                             | 93                                     | 91.21  | 93           | 91.21 | 1.69     | 2.94  |
|                  | 300                             | 272                                    | 260.88 | 90.7         | 88.6  | 1.11     | 2.20  |
| Orange candy     | 0                               | 0                                      | 0      | 0            |       | -        | -     |
|                  | 100                             | 103.3                                  | 99.89  | 103.3        | 99.89 | 2.44     | 2.91  |
|                  | 300                             | 296.8                                  | 291.6  | 98.93        | 97.2  | 1.91     | 2.12  |
| Carrot juice     | 0                               | 0                                      |        | 0            | 0     | -        | -     |
|                  | 100                             | 96.3                                   | 93.7   | 96.3         | 93.7  | 2.31     | 2.77  |
|                  | 300                             | 279.4                                  | 263.3  | 93.1         | 87.7  | 2.17     | 2.46  |
| Orange ice cream | 0                               | 0                                      | 0      | 0            | 0     | -        | -     |
|                  | 100                             | 97.4                                   | 96.84  | 97.4         | 94.84 | 3.11     | 3.64  |
|                  | 300                             | 283.6                                  | 276.73 | 94.5         | 92.2  | 2.92     | 3.34  |
